# Supplementary material for: Macrophages Promote Subtype Conversion and Endocrine Resistance in Breast Cancer
Source: MDPI journal article supplement (doi:10.3390/cancers16030678), 2024-02-05

## Supplementary Materials

**A**

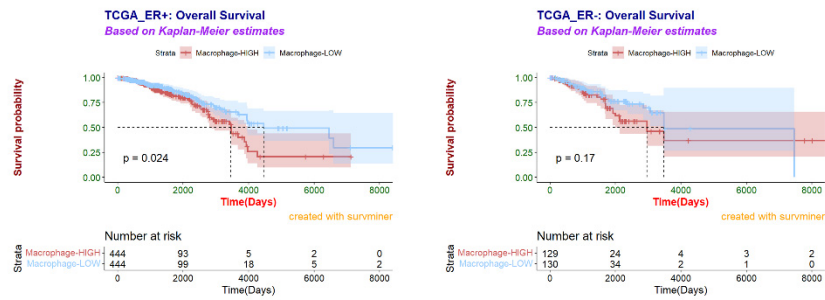

**B**

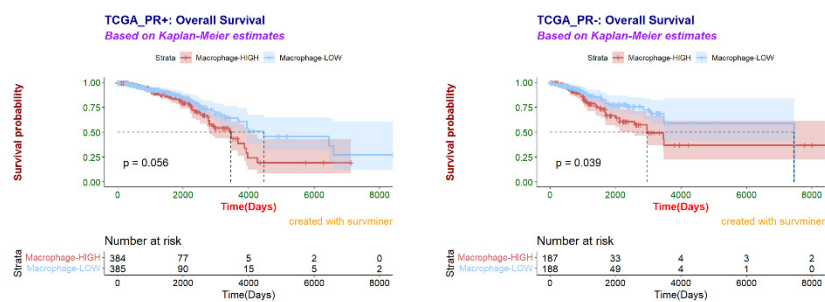

**C**

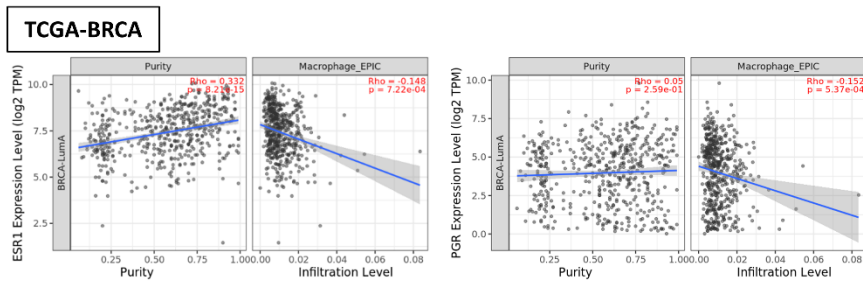

**D**

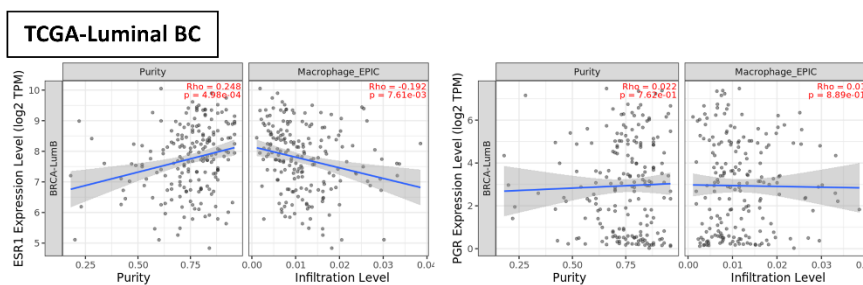

Figure S1. Relationship between molecular classification, lymph node staging, and clinical prognosis. (A, B) Survival analysis of macrophages in ER<sup>+</sup>, ER<sup>-</sup>, PR<sup>+</sup>, and PR<sup>-</sup> breast cancer, data from TCGA, the infiltration degree of macrophages was grouped using TIMER 2.0. (C, D) Correlation analysis between the infiltration degree of macrophages and the expression of ESR1 in patients with breast cancer or luminal breast cancer in the TCGA dataset, the infiltration degree of macrophages was grouped using EPIC.

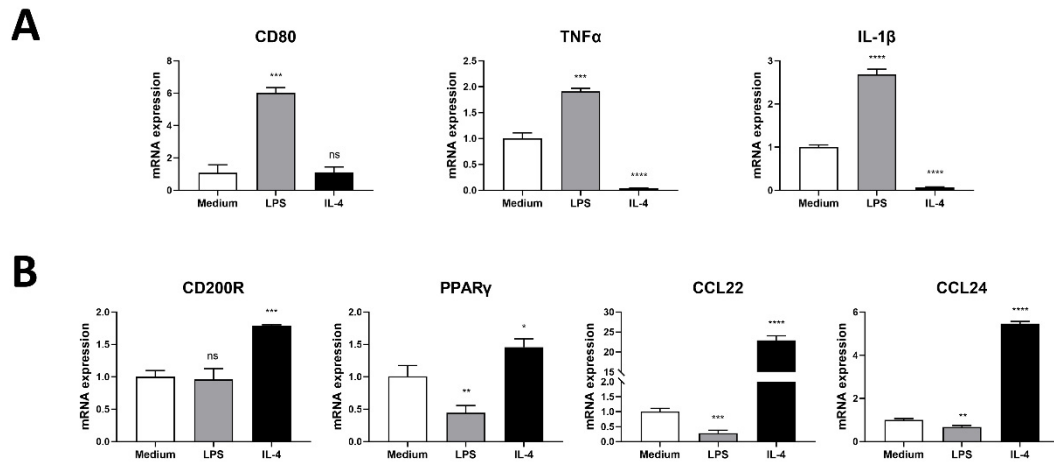

Figure S2. Expression of phenotypic markers on in vitro polarized macrophages.

(A, B) THP-1 were differentiated into macrophages (M0) and polarized in M1 macrophages with LPS (100 ng/ml) and M2 macrophages with IL-4 (20 ng/mL). The phenotypic markers on M1 macrophages were CD80, TNFα, and IL-1β (A). The phenotypic markers on M2 macrophages were CD200R, PPARγ, CCL22, and CCL24 (B). Data present as mean ± SEM, *ns* indicates  $p > 0.05$ , \*  $p < 0.05$ , \*\*  $p < 0.01$ , \*\*\*  $p < 0.001$ , \*\*\*\*  $p < 0.0001$ .

Supplementary Table S1. Clinical characteristics of the BC tissue microarrays.

| Characteristics  | No.of patients | Subtype conversion |    | P-value |
|------------------|----------------|--------------------|----|---------|
|                  |                | Yes                | No |         |
| Patients         | 47             | 8                  | 39 |         |
| Age              |                |                    |    | >0.9999 |
| ≤60              | 39             | 7                  | 32 |         |
| >60              | 8              | 1                  | 7  |         |
| Grade            |                |                    |    | 0.1554  |
| 1                | 7              | 3                  | 4  |         |
| 2                | 26             | 4                  | 22 |         |
| 3                | 9              | 0                  | 9  |         |
| NA               | 5              | 1                  | 4  |         |
| T classification |                |                    |    | 0.4060  |
| T1-T2            | 32             | 7                  | 25 |         |
| T3-T4            | 15             | 1                  | 14 |         |
| N classification |                |                    |    | >0.9999 |
| N0-N1            | 28             | 5                  | 23 |         |
| N2-N3            | 19             | 3                  | 16 |         |
| ER               |                |                    |    | >0.9999 |
| Positive         | 18             | 3                  | 15 |         |
| Negative         | 29             | 5                  | 24 |         |
| PR               |                |                    |    | 0.4133  |
| Positive         | 13             | 1                  | 12 |         |
| Negative         | 34             | 7                  | 27 |         |
| HER2             |                |                    |    | 0.0574  |
| Positive         | 20             | 6                  | 14 |         |
| Negative         | 27             | 2                  | 25 |         |

Supplementary Table S2. Clinical characteristics of the BC patients.

| Characteristics          | No.of patients | Subtype conversion |    | P-value |
|--------------------------|----------------|--------------------|----|---------|
|                          |                | Yes                | No |         |
| Patients                 | 64             | 28                 | 36 |         |
| Age                      |                |                    |    | >0.9999 |
| ≤60                      | 54             | 24                 | 30 |         |
| >60                      | 10             | 4                  | 6  |         |
| Recurrence               |                |                    |    | >0.9999 |
| NO                       | 61             | 27                 | 34 |         |
| YES                      | 3              | 1                  | 2  |         |
| Stage                    |                |                    |    | 0.4898  |
| I-II                     | 18             | 9                  | 9  |         |
| III-IV                   | 35             | 13                 | 22 |         |
| NA                       | 11             | 6                  | 5  |         |
| T classification         |                |                    |    | 0.4119  |
| T1-T2                    | 42             | 17                 | 25 |         |
| T3-T4                    | 18             | 8                  | 10 |         |
| NA                       | 4              | 3                  | 1  |         |
| N classification         |                |                    |    | 0.5948  |
| N0-N1                    | 30             | 14                 | 16 |         |
| N2-N3                    | 29             | 11                 | 18 |         |
| NA                       | 5              | 3                  | 2  |         |
| M classification         |                |                    |    | 0.1685  |
| M0                       | 46             | 20                 | 26 |         |
| M1-M3                    | 13             | 4                  | 9  |         |
| NA                       | 5              | 4                  | 1  |         |
| ER                       |                |                    |    | 0.1112  |
| Positive                 | 42             | 15                 | 27 |         |
| Negative                 | 22             | 13                 | 9  |         |
| PR                       |                |                    |    | 0.2073  |
| Positive                 | 36             | 13                 | 23 |         |
| Negative                 | 28             | 15                 | 13 |         |
| HER2                     |                |                    |    | 0.3134  |
| Positive                 | 25             | 13                 | 12 |         |
| Negative                 | 29             | 15                 | 24 |         |
| Subtype (Primary tumors) |                |                    |    | 0.1279  |
| Luminal A                |                | 9                  | 20 |         |
| Luminal B                |                | 5                  | 8  |         |
| HER2-E                   |                | 8                  | 4  |         |
| TNBC                     |                | 6                  | 4  |         |

Supplementary Table S3. Primer sequence.

| Primer      | Sequence (5' to 3')     |
|-------------|-------------------------|
| H-MNX1-F    | TCCACCGCGGGCATGATCCTG   |
| H-MNX1-R    | GGCCCCAGCAGCTCCTCGGCTC  |
| H-NKX2-2-F  | CCGGGCCGAGAAAGGTATG     |
| H-NKX2-2-R  | GTTTGCCGTCCCTGACCAA     |
| H-β-actin-F | GGCACTCTTCCAGCCTTCCT    |
| H-β-actin-R | GCACTGTGTTGGCGTACAGG    |
| H-ESR1-F    | CCCACTCAACAGCGTGTCTC    |
| H-ESR1-R    | CGTCGATTATCTGAATTTGGCCT |
| H-ESR2-F    | CAGGCATGCGAGTAACAAGG    |
| H-ESR2-R    | GCAGGTCATACACTGGGACC    |
| H-PGR-F     | TTATGGTGTCTTACCTGTGGG   |
| H-PGR-R     | GCGGATTTTATCAACGATGCAG  |

|           |                        |
|-----------|------------------------|
| H-EGFR-F  | ATCATACGCGGCAGGACCA    |
| H-EGFR-R  | TCTGACCGGAGGTCCCAAAC   |
| H-ERBB2-F | TGCAGGGAAACCTGGAACCTC  |
| H-ERBB2-R | ACAGGGGTGGTATTGTTTCAGC |

---

## Uncropped blots for Figure 3

### 1. T47D

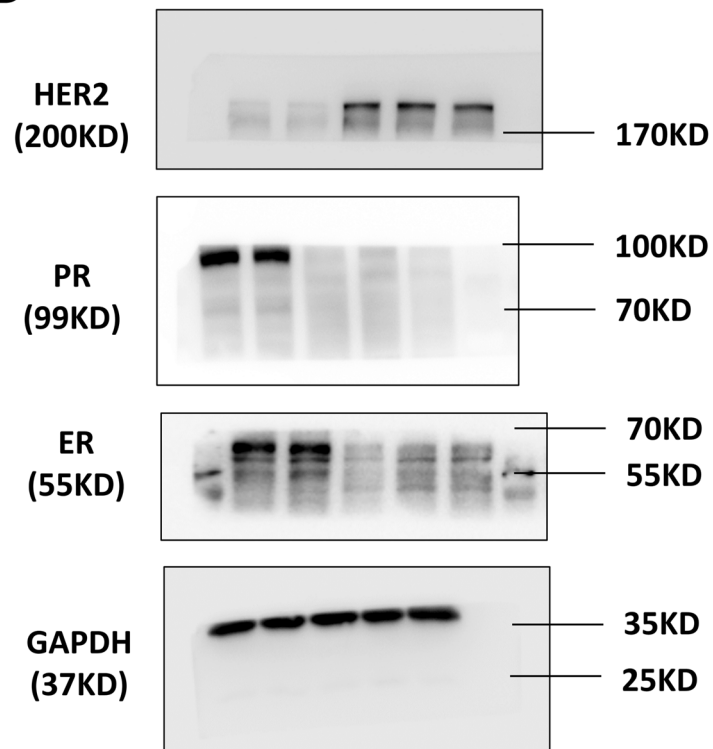

### 2. BT474

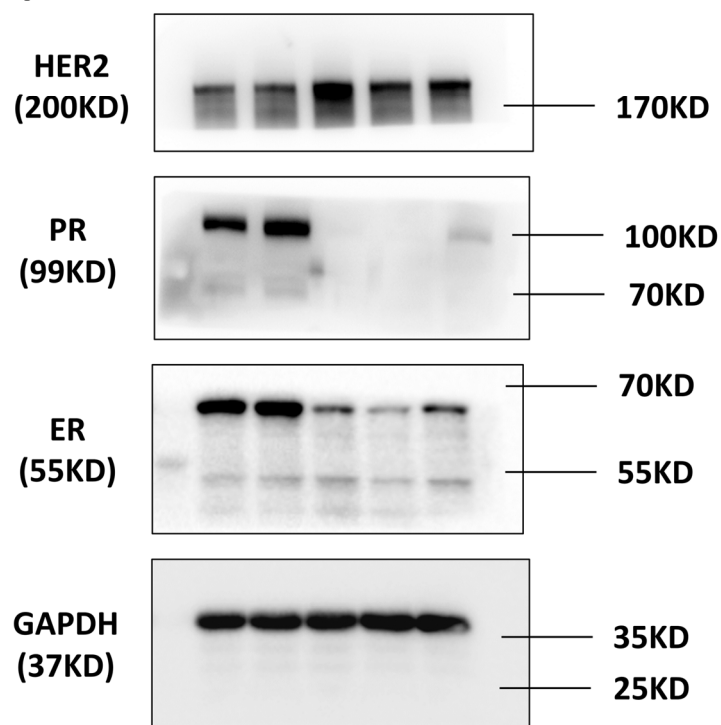

Supplement: s1 [file s1]
